# Supplementary material for: A Spotlight on the Role of Radiomics and Machine-Learning Applications in the Management of Intracranial Meningiomas: A New Perspective in Neuro-Oncology: A Review
Source: MDPI journal article supplement (doi:10.3390/life12040586), 2022-04-14
Supplement: s1 [file s1]

((((radiomics) OR (machine learning) OR (deep learning) OR (artificial intelligence) AND (meningioma)) OR ((radiomics) OR (machine learning) OR (deep learning) OR (artificial intelligence) AND (intracranial meningioma)))
