# Supplementary material for: A Spotlight on the Role of Radiomics and Machine-Learning Applications in the Management of Intracranial Meningiomas: A New Perspective in Neuro-Oncology: A Review
Source: Life (Basel). 2022 Apr 14;12(4):586. doi: 10.3390/life12040586 (PMC9026541; doi:10.3390/life12040586)
Supplement: Supplementary file 1 [file life-12-00586-s001.zip › Table S2 Literature review search overview.xlsx]

## Sheet: Blad1
first_authors	publication_year	journal_title	doi
Ugga L, Perillo T, Cuocolo R, Stanzione A, Romeo V, Green R, Cantoni V, Brunetti A	2021	Neuroradiology	10.1007/s00234-021-02668-0
Won SY, Park YW, Ahn SS, Moon JH, Kim EH, Kang SG, Chang JH, Kim SH, Lee SK	2021	European Journal of Radiology	10.1016/j.ejrad.2021.109673
Li N, Mo Y, Huang C, Han K, He M, Wang X, Wen J, Yang S, Wu H, Dong F, Sun F, Li Y, Yu Y, Zhang M, Guan X, Xu X	2021	Frontiers in Oncology	10.3389/fonc.2021.752158
Zhai Y, Song D, Yang F, Wang Y, Jia X, Wei S, Mao W, Xue Y, Wei X	2021	Frontiers in Oncology	10.3389/fonc.2021.657288
Ko CC, Zhang Y, Chen JH, Chang KT, Chen TY, Lim SW, Wu TC, Su MY	2021	Frontiers in Neurology	10.3389/fneur.2021.636235
Xiao D, Zhao Z, Liu J, Wang X, Fu P, Le Grange JM, Wang J, Guo X, Zhao H, Shi J, Yan P, Jiang X	2021	Frontiers in Oncology	10.3389/fonc.2021.708040
Khanna O, Fathi Kazerooni A, Farrell CJ, Baldassari MP, Alexander TD, Karsy M, Greenberger BA, Garcia JA, Sako C, Evans JJ, Judy KD, Andrews DW, Flanders AE, Sharan AD, Dicker AP, Shi W, Davatzikos C	2021	Neurosurgery	10.1093/neuros/nyab307
Cepeda S, Arrese I, García-García S, Velasco-Casares M, Escudero-Caro T, Zamora T, Sarabia R	2021	World Neurosurgery	10.1016/j.wneu.2020.11.113
Xiao B, Fan Y, Zhang Z, Tan Z, Yang H, Tu W, Wu L, Shen X, Guo H, Wu Z, Zhu X	2021	Frontiers in Oncology	10.3389/fonc.2021.625220
Zhang H, Mo J, Jiang H, Li Z, Hu W, Zhang C, Wang Y, Wang X, Liu C, Zhao B, Zhang J, Zhang K	2021	Neuroinformatics	10.1007/s12021-020-09492-6
Laukamp KR, Pennig L, Thiele F, Reimer R, Görtz L, Shakirin G, Zopfs D, Timmer M, Perkuhn M, Borggrefe J	2020	Clinical Neuroradiology	10.1007/s00062-020-00884-4
Joo L, Park JE, Park SY, Nam SJ, Kim YH, Kim JH, Kim HS	2020	Neuro-Oncology	10.1093/neuonc/noaa190
Han Y, Wang T, Wu P, Zhang H, Chen H, Yang C	2020	Magnetic Resonance Imaging	10.1016/j.mri.2020.11.009
Neromyliotis E, Kalamatianos T, Paschalis A, Komaitis S, Fountas KN, Kapsalaki EZ, Stranjalis G, Tsougos I	2020	Journal of Magnetic Resonance Imaging	10.1002/jmri.27378
Hu J, Zhao Y, Li M, Liu J, Wang F, Weng Q, Wang X, Cao D	2020	European Journal of Radiology	10.1016/j.ejrad.2020.109251
Maki S, Furuya T, Horikoshi T, Yokota H, Mori Y, Ota J, Kawasaki Y, Miyamoto T, Norimoto M, Okimatsu S, Shiga Y, Inage K, Orita S, Takahashi H, Suyari H, Uno T, Ohtori S	2020	Spine	10.1097/BRS.0000000000003353
Gu H, Zhang X, di Russo P, Zhao X, Xu T	2020	Frontiers in Oncology	10.3389/fonc.2020.567736
Chu H, Lin X, He J, Pang P, Fan B, Lei P, Guo D, Ye C	2020	Academic Radiology	10.1016/j.acra.2020.03.034
Dong J, Yu M, Miao Y, Shen H, Sui Y, Liu Y, Han L, Li X, Lin M, Guo Y, Xie L	2020	BioMed Research International	10.1155/2020/5042356
Kandemirli SG, Chopra S, Priya S, Ward C, Locke T, Soni N, Srivastava S, Jones K, Bathla G	2020	Clinical Neurology and Neurosurgery	10.1016/j.clineuro.2020.106205
Zhang J, Sun J, Han T, Zhao Z, Cao Y, Zhang G, Zhou J	2020	European Journal of Radiology	10.1016/j.ejrad.2020.109287
Kalasauskas D, Kronfeld A, Renovanz M, Kurz E, Leukel P, Krenzlin H, Brockmann MA, Sommer CJ, Ringel F, Keric N	2020	Cancers	10.3390/cancers12102942
Morin O, Chen WC, Nassiri F, Susko M, Magill ST, Vasudevan HN, Wu A, Vallières M, Gennatas ED, Valdes G, Pekmezci M, Alcaide-Leon P, Choudhury A, Interian Y, Mortezavi S, Turgutlu K, Bush NAO, Solberg TD, Braunstein SE, Sneed PK, Perry A, Zadeh G, McDermott MW, Villanueva-Meyer JE, Raleigh DR	2020	Neuro-Oncology Advances	10.1093/noajnl/vdz011
Zhang J, Yao K, Liu P, Liu Z, Han T, Zhao Z, Cao Y, Zhang G, Zhang J, Tian J, Zhou J	2020	eBioMedicine	10.1016/j.ebiom.2020.102933
Wei J, Li L, Han Y, Gu D, Chen Q, Wang J, Li R, Zhan J, Tian J, Zhou D	2020	Frontiers in Oncology	10.3389/fonc.2020.00534
Laukamp KR, Shakirin G, Baeßler B, Thiele F, Zopfs D, Große Hokamp N, Timmer M, Kabbasch C, Perkuhn M, Borggrefe J	2019	World Neurosurgery	10.1016/j.wneu.2019.08.148
Ke C, Chen H, Lv X, Li H, Zhang Y, Chen M, Hu D, Ruan G, Zhang Y, Zhang Y, Liu L, Feng Y.	2019	Journal of Magnetic Resonance Imaging	10.1002/jmri.26976
Chen C, Guo X, Wang J, Guo W, Ma X, Xu J	2019	Frontiers in Oncology	10.3389/fonc.2019.01338
Zhang Y, Chen JH, Chen TY, Lim SW, Wu TC, Kuo YT, Ko CC, Su MY	2019	Neuroradiology	10.1007/s00234-019-02259-0
Zhu Y, Man C, Gong L, Dong D, Yu X, Wang S, Fang M, Wang S, Fang X, Chen X, Tian J	2019	European Journal of Radiology	10.1016/j.ejrad.2019.04.022
Li X, Lu Y, Xiong J, Wang D, She D, Kuai X, Geng D, Yin B	2019	Journal of Neuroradiology	10.1016/j.neurad.2019.05.013
Banzato T, Causin F, Della Puppa A, Cester G, Mazzai L, Zotti A	2019	Journal of Magnetic Resonance Imaging	10.1002/jmri.26723
Hamerla G, Meyer HJ, Schob S, Ginat DT, Altman A, Lim T, Gihr GA, Horvath-Rizea D, Hoffmann KT, Surov A	2019	Magnetic Resonance Imaging	10.1016/j.mri.2019.08.011
Niu L, Zhou X, Duan C, Zhao J, Sui Q, Liu X, Zhang X	2019	World Neurosurgery	10.1016/j.wneu.2019.02.109
Park YW, Oh J, You SC, Han K, Ahn SS, Choi YS, Chang JH, Kim SH, Lee SK	2018	European Radiology	10.1007/s00330-018-5830-3
Lu Y, Liu L, Luan S, Xiong J, Geng D, Yin B	2018	European Radiology	10.1007/s00330-018-5632-7
Laukamp KR, Thiele F, Shakirin G, Zopfs D, Faymonville A, Timmer M, Maintz D, Perkuhn M, Borggrefe J	2018	European Radiology	10.1007/s00330-018-5595-8
Hale AT, Stonko DP, Wang L, Strother MK, Chambless LB	2018	Neurosurgical Focus	10.3171/2018.8.FOCUS18191
Coroller TP, Bi WL, Huynh E, Abedalthagafi M, Aizer AA, Greenwald NF, Parmar C, Narayan V, Wu WW, Miranda de Moura S, Gupta S, Beroukhim R, Wen PY, Al-Mefty O, Dunn IF, Santagata S, Alexander BM, Huang RY, Aerts HJWL	2017	PlosOne	10.1371/journal.pone.0187908
